# Supplementary material for: Tailoring the resolution of single-cell RNA sequencing for primary cytotoxic T cells
Source: PubMed Central journal article supplement (PMC7835213; doi:10.1038/s41467-020-20751-7), 2021-01-25
Supplement: 41467_2020_20751_MOESM1_ESM.pdf [file 41467_2020_20751_MOESM1_ESM.pdf]

## Supplementary Figure 1. Schematic protocol representation of SCRB-seq and Drop-seq.

(A) Schematic representation of the P14 experimental system. The green, blue and red colour denote naïve P14 T cells, P14 T cells recovered at day 8 post LCMV Armstrong infection and P14 T cells recovered at day 40 post LCMV clone-13 infection respectively. (B) Illustrates the difference in the single-cell capturing strategy of SCRB-seq versus Drop-seq. (C) Representation of the common chemistry downstream of single-cell capturing.

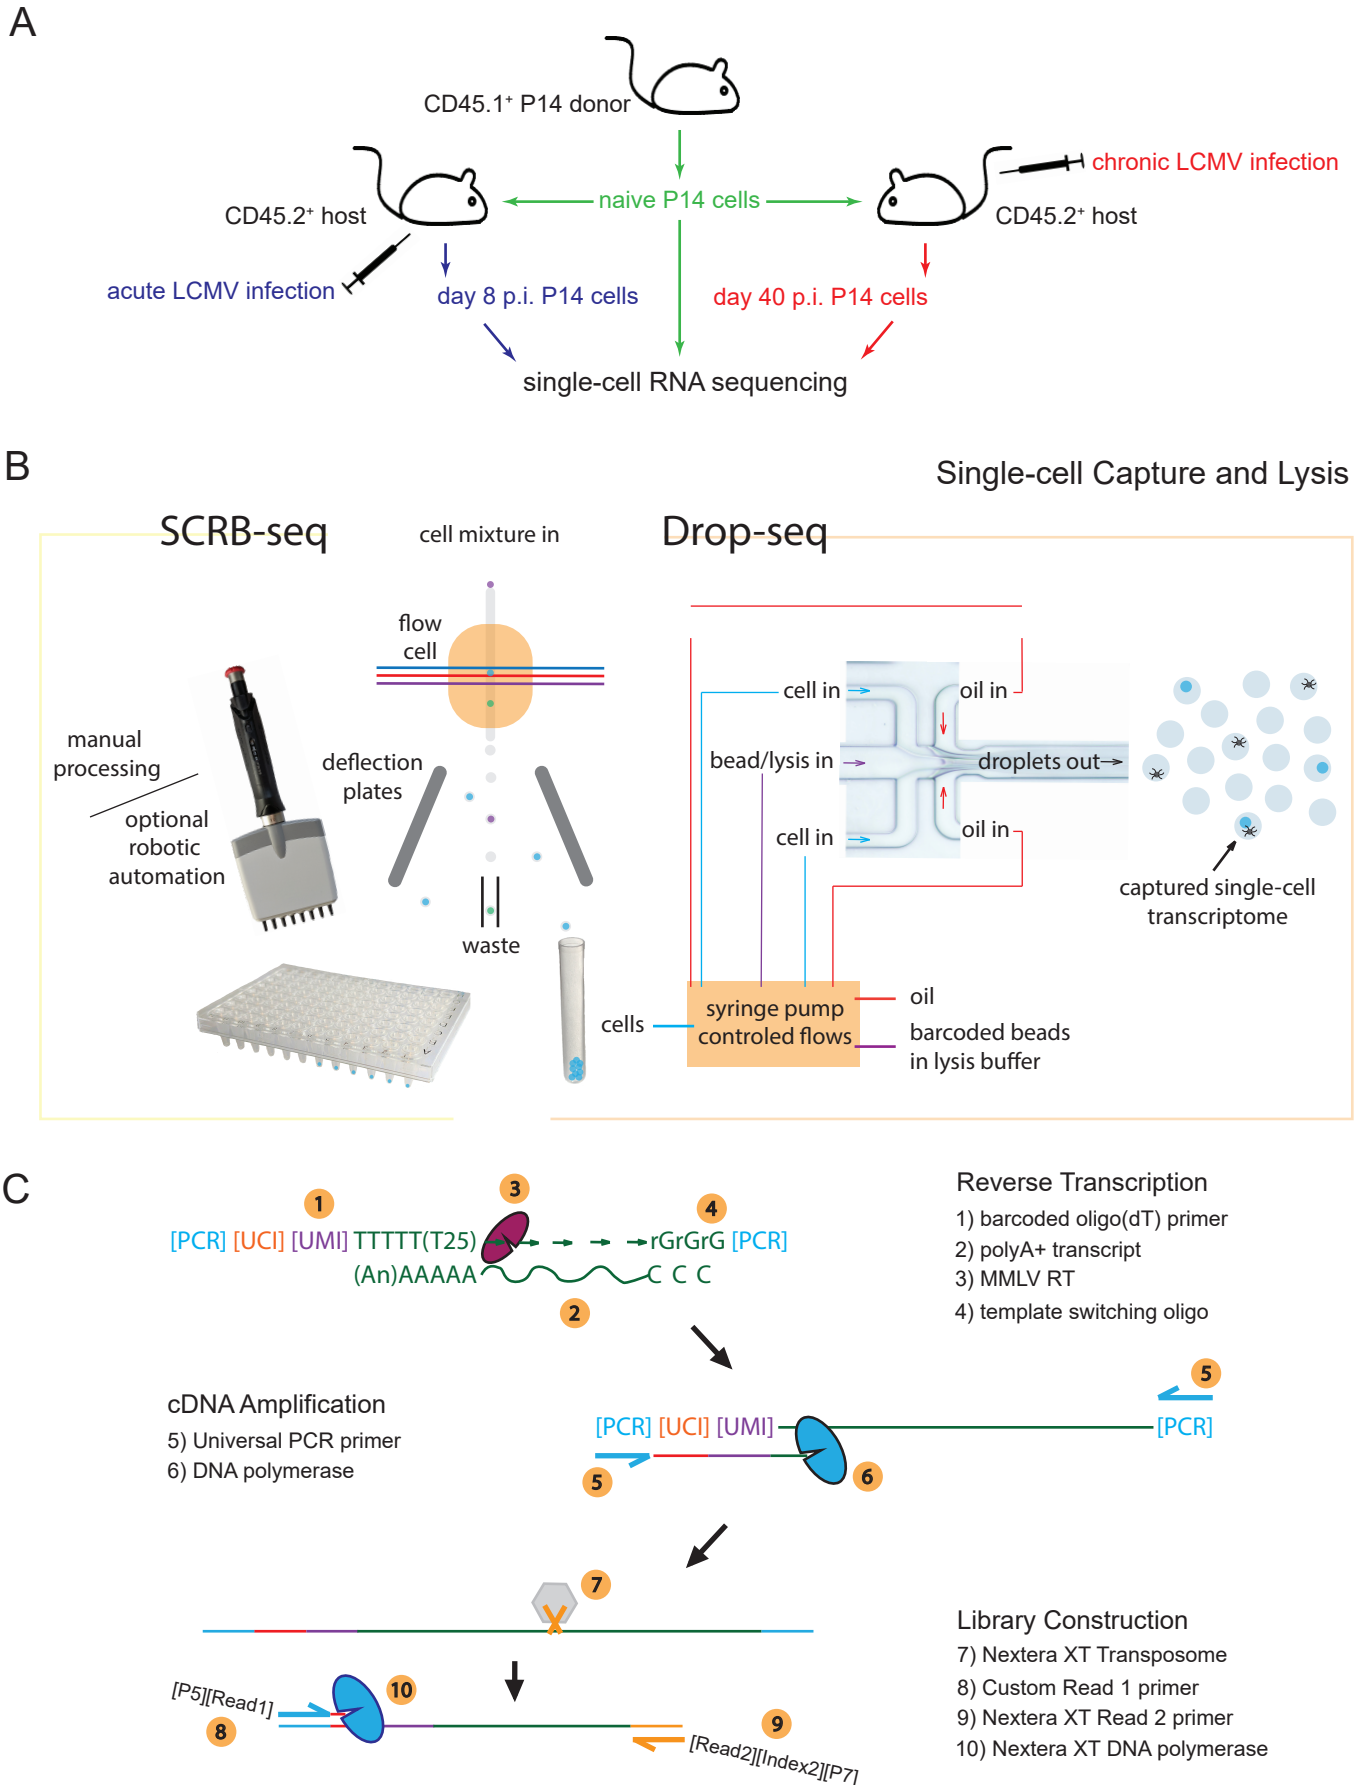

## Supplementary Figure 2. Comparison of the cDNA yield among different Drop-seq optimizations.

(A-C) Bioanalyzer electropherograms comparing the amplified cDNA yield of Drop-seq between the original protocol and various optimizations.

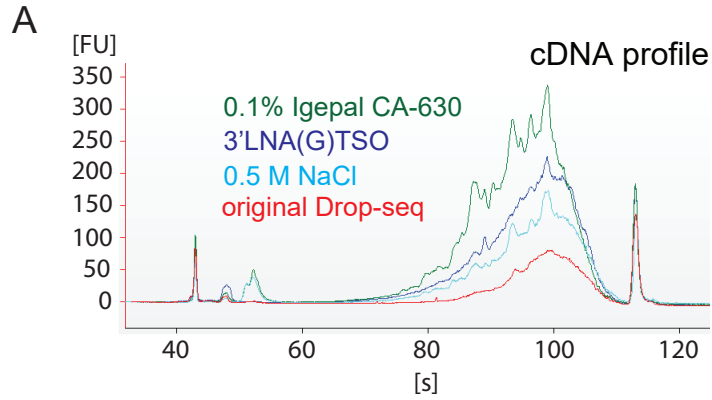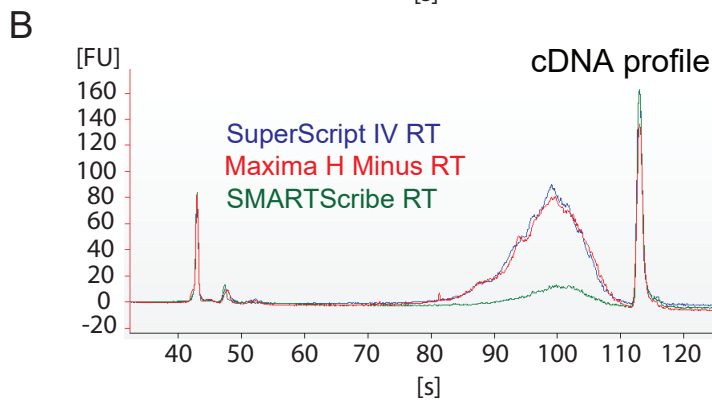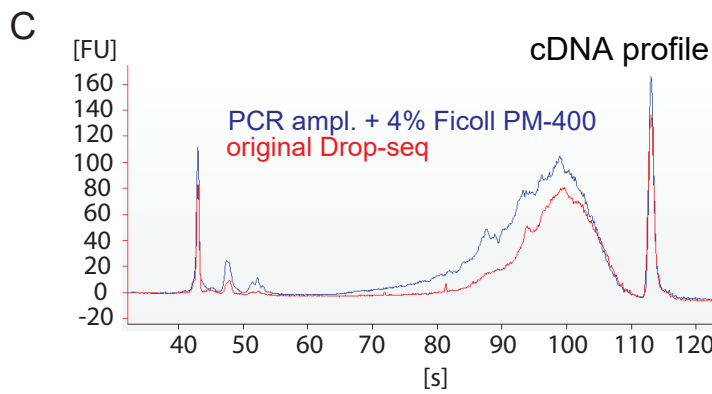

### Supplementary Figure 3. Technical characteristics of libraries generated with tSCRB-seq and 10xGenomics Chromium from different cell types and states.

Comparative analysis of major technical parameters among a library generated with tSCRB-seq (P14 T cells recovered at day 8 post LCMV Armstrong infection) and published libraries generated with 10xGenomics Chromium (naïve or recovered at day 8 post LCMV Armstrong P14 T cells<sup>22</sup> and cord blood mononuclear cells available on the manufacturer's website).

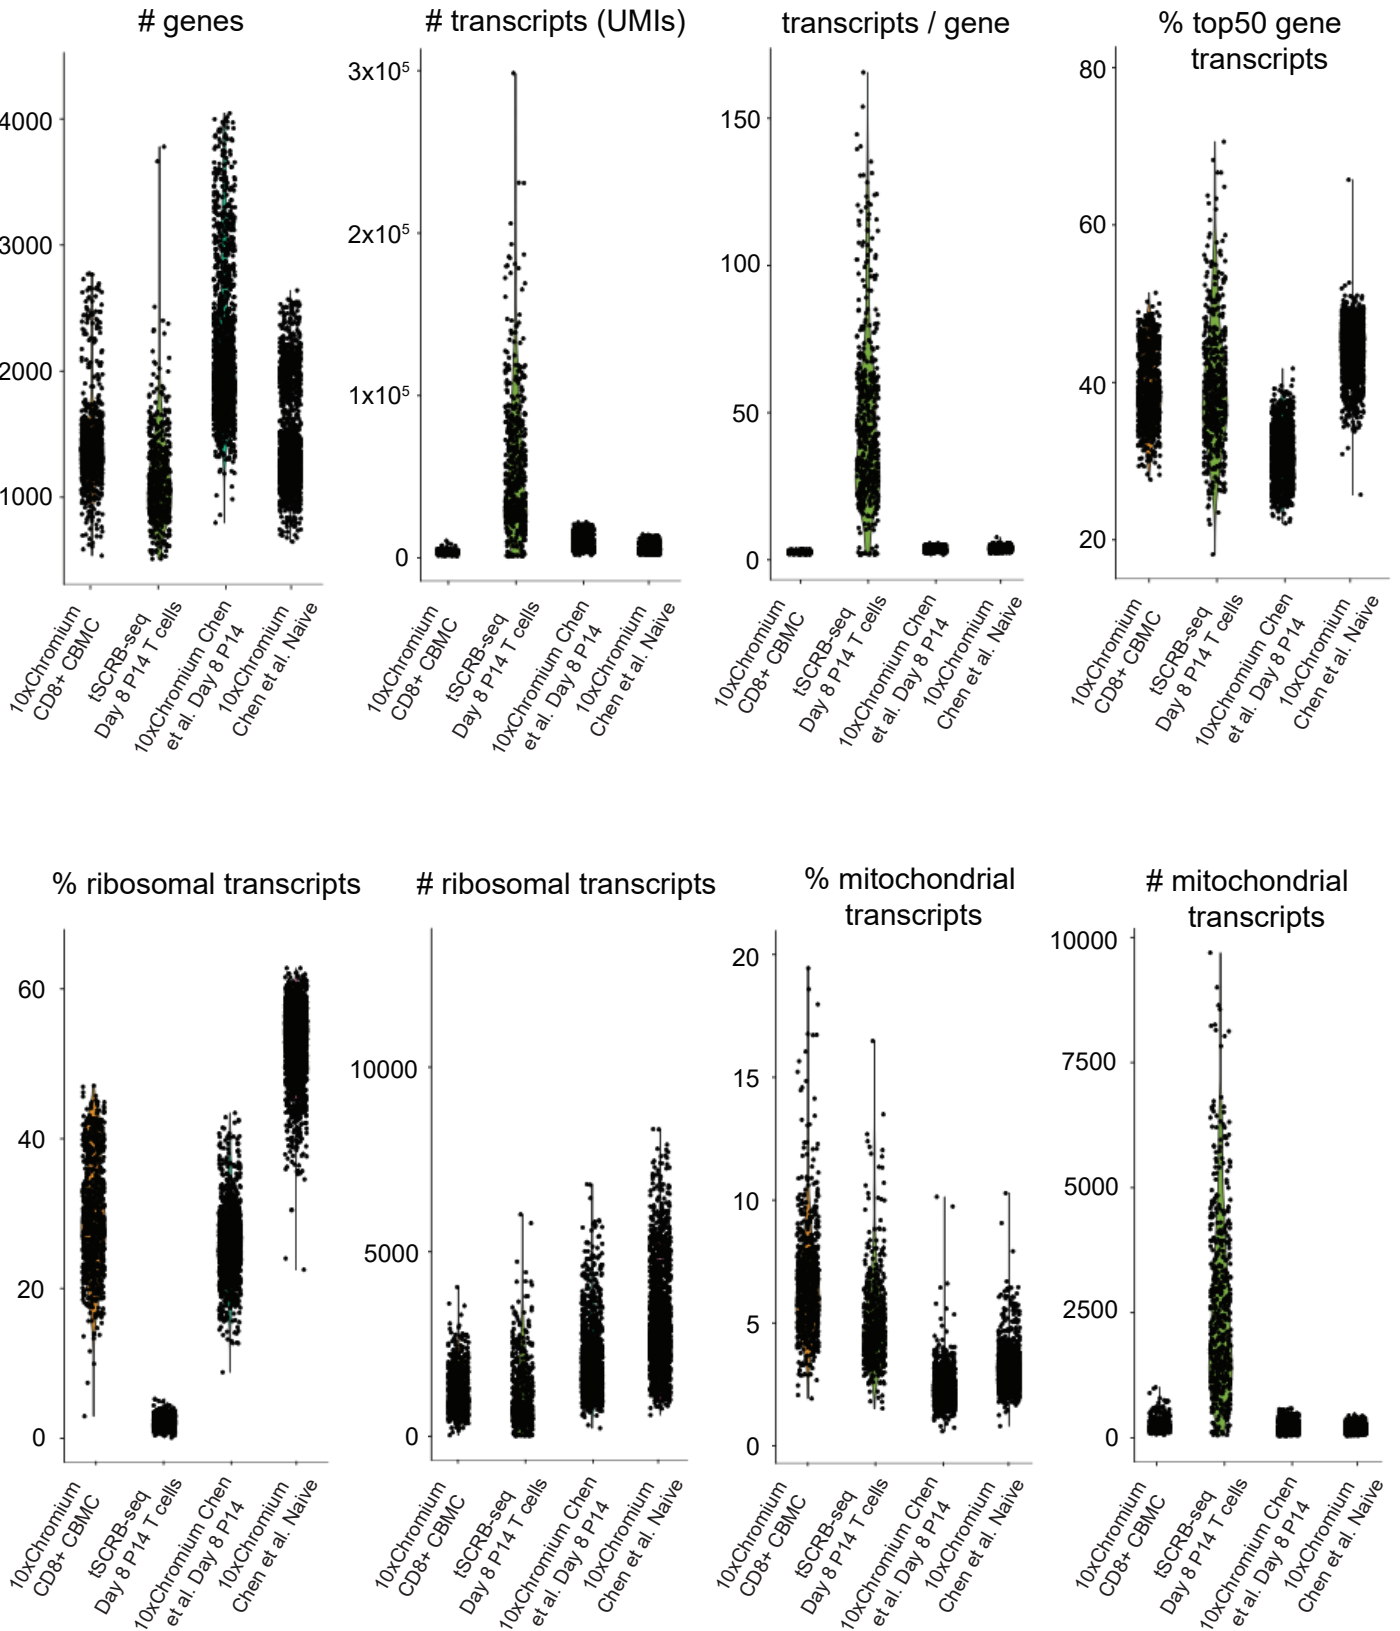

## Supplementary Figure 4. The higher dynamic range of gene expression detected with tSCBR-seq results in improved compartment-resolved expression of key immune genes in chronic infection.

Comparative analysis of single-cell P14 T-cell transcriptomes generated with tSCBR-seq<sup>12</sup> or 10xChromium<sup>13</sup> and recovered from established LCMV clone-13 infections (on day 40 and day 30 respectively). Each circle represents a single-cell. The plots represent the expression of key for CD8 T cell differentiation and function immune genes and regulatory receptors depicted over tSNE. The expression level is illustrate using the red scale in plots based on the tSCBR-seq data and violet scale in plots using the 10xChromium data.

tSCBR-seq 10xChromium

### Progenitor markers

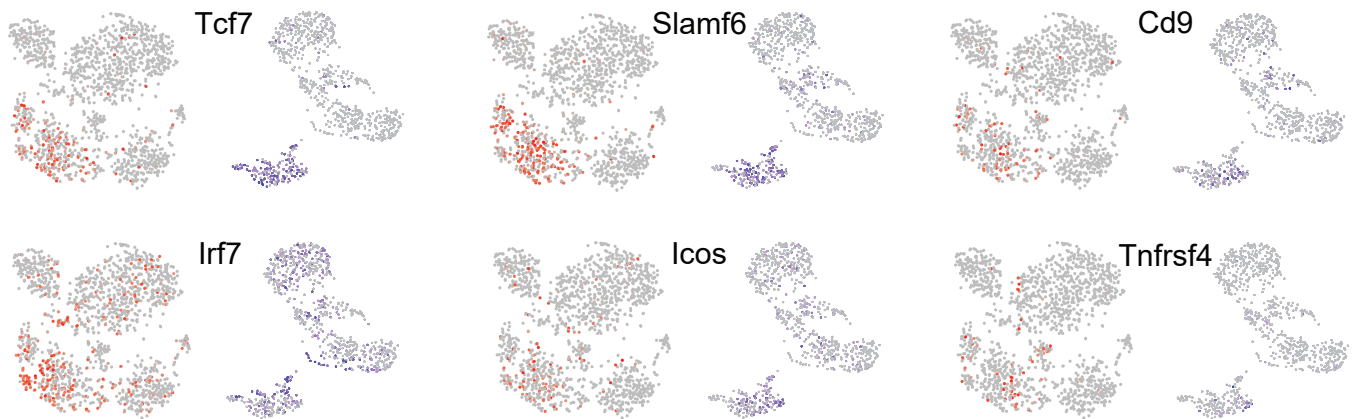

### Exhaustion markers

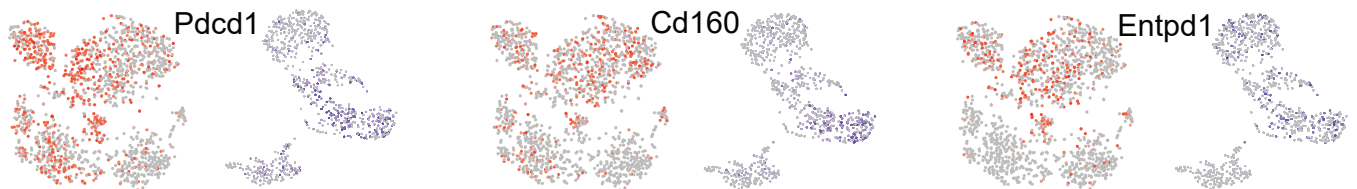

### Effector markers

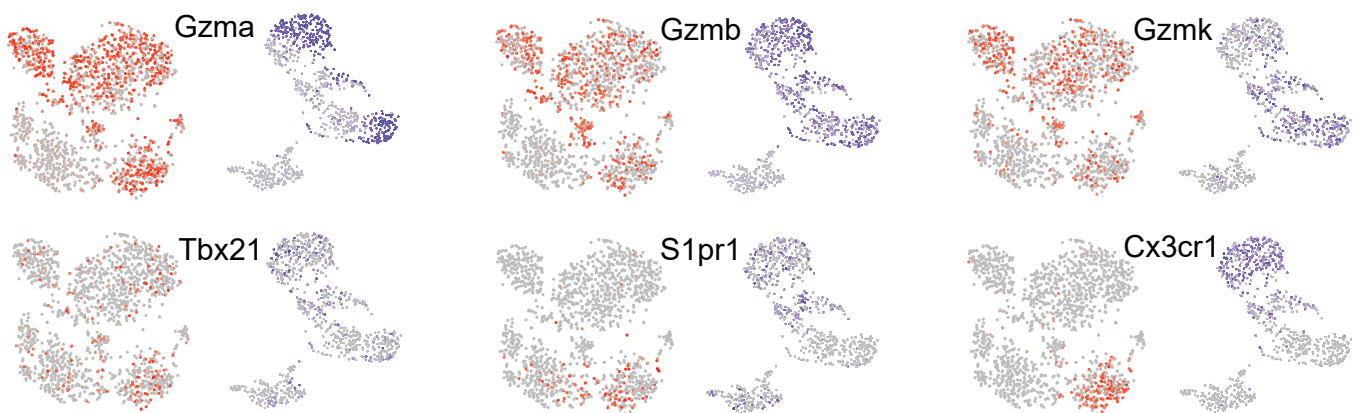

## Supplementary Figure 5. Single-cell sort gating strategy.

### Naïve P14 sort

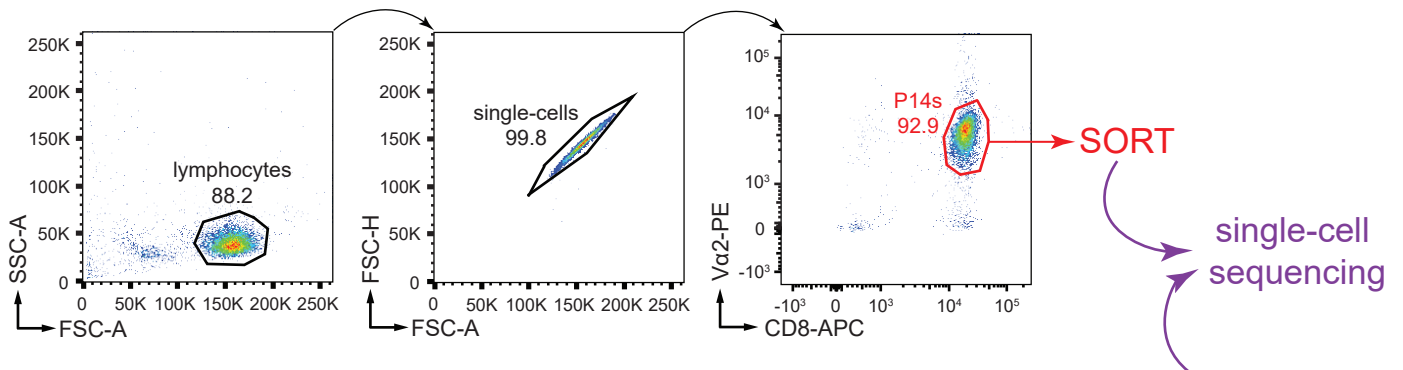

### Activated P14 sort

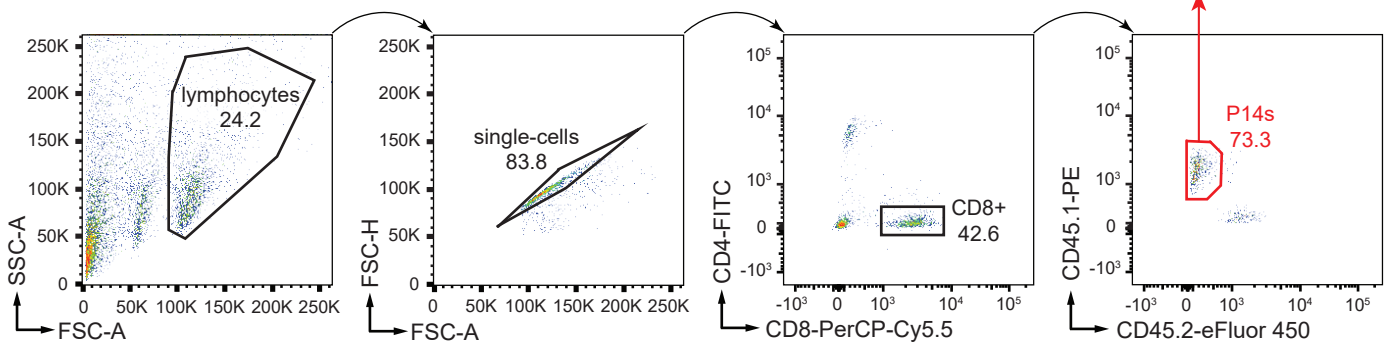

**Supplementary Table 1. Fraction of cell positive for selected key immune genes among methods.**

Analysis of libraries generated with tDrop-seq and tSCRB-seq from P14 T-cells recovered at day 8 post-acute LCMV Armstrong infection, compared to a published 10xChromium dataset with matching experimental setup<sup>22</sup>. Comparison of the fraction of cell detected to express key immune genes among methods.

| P14 cells recovered on day 8 from acute infection |           |           |             |
|---------------------------------------------------|-----------|-----------|-------------|
| GENE                                              | tDROP-seq | tSCRB-seq | 10xChromium |
| Gzma                                              | 87%       | 95%       | 42%         |
| Gzmb                                              | 81%       | 89%       | 90%         |
| Prf1                                              | 55%       | 64%       | 11%         |
| Fasl                                              | 12%       | 10%       | 21%         |
| Klrg1                                             | 67%       | 56%       | 55%         |
| Id2                                               | 80%       | 76%       | 95%         |
| Tbx21                                             | 38%       | 56%       | 47%         |
| Klf2                                              | 72%       | 85%       | 43%         |
| Klf3                                              | 46%       | 70%       | 54%         |
| S1pr1                                             | 38%       | 41%       | 58%         |
| S1pr4                                             | 40%       | 53%       | 92%         |
| S1pr5                                             | 37%       | 42%       | 21%         |
| Tcf7                                              | 10%       | 9%        | 24%         |
| Slamf6                                            | 14%       | 12%       | 45%         |
| Il7r                                              | 9%        | 6%        | 10%         |
| Eomes                                             | 23%       | 6%        | 22%         |
| Id3                                               | 0%        | 1%        | 5%          |
| Bcl2                                              | 7%        | 9%        | 29%         |
| Mki67                                             | 61%       | 31%       | 13%         |
| Ezh2                                              | 35%       | 38%       | 29%         |
| Cumulative detection                              | 41%       | 42%       | 40%         |

**Supplementary Table 2. Number of transcripts per cell of selected key immune genes detected by each method.**

Comparative analysis of the number of transcripts per cell of key immune genes detected by tDrop-seq, tSCRB-seq and 10xGenomics Chromium<sup>22</sup> in P14 T cells recovered on day 8 post LCMV Armstrong infection. All sequencing data are down-sampled to 40 000 mapped reads per cell. Source data are provided as a Source Data file. The abbreviations are as follows: md. transcripts, median number of transcripts captured per cell; SD, standard deviation

| P14 CD8 T cells recovered on day 8 post LCMV Armstrong infection |                   |      |                   |       |                   |      |
|------------------------------------------------------------------|-------------------|------|-------------------|-------|-------------------|------|
|                                                                  | tDrop-seq         |      | tSCRB-seq         |       | 10xChrom          |      |
|                                                                  | md. # transcripts | SD   | md. # transcripts | SD    | md. # transcripts | SD   |
| Gzma                                                             | 7.0               | 17.5 | 180.0             | 405.1 | 4.0               | 34.7 |
| Gzmb                                                             | 3.0               | 3.7  | 62.0              | 115.0 | 9.0               | 11.9 |
| Prf1                                                             | 1.0               | 1.3  | 35.0              | 70.7  | 2.0               | 1.4  |
| Fasl                                                             | 1.0               | 0.7  | 23.0              | 46.3  | 1.0               | 0.5  |
| Klrg1                                                            | 2.0               | 2.3  | 22.0              | 34.8  | 2.0               | 2.1  |
| Id2                                                              | 4.0               | 4.0  | 35.5              | 72.8  | 11.0              | 10.0 |
| Tbx21                                                            | 1.0               | 0.6  | 20.0              | 32.9  | 1.0               | 1.0  |
| Klf2                                                             | 1.0               | 1.1  | 27.0              | 74.3  | 1.0               | 1.0  |
| Klf3                                                             | 2.0               | 1.8  | 28.5              | 43.8  | 1.0               | 1.2  |
| S1pr1                                                            | 1.0               | 0.9  | 14.0              | 24.2  | 1.0               | 1.1  |
| S1pr4                                                            | 1.0               | 0.9  | 13.0              | 18.5  | 3.0               | 2.8  |
| S1pr5                                                            | 1.5               | 1.3  | 26.0              | 55.6  | 1.0               | 1.0  |
| Tcf7                                                             | 2.0               | 0.8  | 12.5              | 28.5  | 1.0               | 1.9  |
| Slamf6                                                           | 2.0               | 1.0  | 23.5              | 46.7  | 1.0               | 1.8  |
| Il7r                                                             | 1.0               | 1.3  | 25.0              | 49.0  | 1.0               | 1.0  |
| Eomes                                                            | 1.0               | 1.5  | 6.5               | 42.6  | 1.0               | 0.8  |
| Id3                                                              | 1.0               | 0.0  | 9.0               | 37.5  | 1.0               | 1.8  |
| Bcl2                                                             | 2.0               | 0.6  | 12.0              | 20.3  | 1.0               | 1.6  |
| Mki67                                                            | 2.0               | 6.4  | 28.0              | 208.5 | 2.0               | 2.1  |
| Ezh2                                                             | 2.0               | 1.4  | 44.0              | 76.2  | 1.0               | 1.6  |

\*All sequencing data were down-sampled to 40 000 mapped reads/cell.

**Supplementary Table 3. Primer sequences.**

| Primer           | Primer full name                                           | Primer sequence                                                                                              | Producer                    | Purity                             | Note                                                                                                                                                                                                                                                    |
|------------------|------------------------------------------------------------|--------------------------------------------------------------------------------------------------------------|-----------------------------|------------------------------------|---------------------------------------------------------------------------------------------------------------------------------------------------------------------------------------------------------------------------------------------------------|
| DS-BEADS         | ChemGenes Barcoded Oligo dT primer ON Beads                | 5'-Bead-Linker--TTTTTTTAAGCAGTGGTATCAAC<br>GCAGAGTACJJJJJJJJJJNNNNNNNN<br>TTTTTTTTTTTTTTTTTTTTTTTTTTTTTT--3' | ChemGenes Corporation       | -                                  | J denotes a nucleic acid part of the cellular barcode, which is identical in all primers attached to one bead; N denotes a random nucleic acid part of the unique molecular identifier, which is a unique sequence in each primer attached to one bead. |
| DS-TSO           | Drop-seq Template Switching Oligo                          | AAGCAGTGGTATCAACGCAGAGTGAATrGrGrG                                                                            | Eurogentec                  | HPLC                               | rG denotes a riboguanine                                                                                                                                                                                                                                |
| DS-TSO-LNA       | Drop-seq Template Switching Oligo with Locked Nucleic Acid | AAGCAGTGGTATCAACGCAGAGTGAATrGrG+G                                                                            | Eurogentec                  | HPLC                               | rG denotes a riboguanine; +G denotes a locked nucleic acid guanine                                                                                                                                                                                      |
| DS-SMART PCR     | Drop-seq SMART PCR Primer                                  | AAGCAGTGGTATCAACGCAGAGT                                                                                      | Integrated DNA Technologies | HPLC                               |                                                                                                                                                                                                                                                         |
| DS-P5            | Drop-seq N5 primer                                         | AATGATACGGCGACCACCGAGATCTACACGCCTGTCCGC<br>GGAAGCAGTGGTATCAACGCAGAGT*A*C                                     | Integrated DNA Technologies | HPLC                               | * denotes a phosphorothioate bond                                                                                                                                                                                                                       |
| DS-CR1           | Drop-seq Custom Read 1 Primer                              | GCCTGTCCGCGGAAGCAGTGGTATCAACGCAGAGTAC                                                                        | Integrated DNA Technologies | HPLC                               |                                                                                                                                                                                                                                                         |
| SCRB-dT plate v1 | tSCRB Barcoded Oligo-dT Primer Plate v1                    | /5Biosg/ACACTCTTCCCTACACGACGCTCTCCGATCTJ(6)N(10)T(30)VN                                                      | Integrated DNA Technologies | Ultramer Plate; Standard desalting | /5Biosg/ denotes a 5' biotin; J denotes a nucleic acid part of the cellular barcode; N denotes a random nucleic acid part of the unique molecular identifier; V denotes A or C or G                                                                     |
| SCRB-dT plate v2 | tSCRB Barcoded Oligo-dT Primer Plate v2 and v3             | /5Biosg/ACACTCTTCCCTACACGACGCTCTCCGATCTJ(7)N(9)T(30)VN                                                       | Integrated DNA Technologies | Ultramer Plate; Standard desalting | /5Biosg/ denotes a 5' biotin; J denotes a nucleic acid part of the cellular barcode; N denotes a random nucleic acid part of the unique molecular identifier; V denotes A or C or G                                                                     |
| SCRB-TSO         | tSCRB-seq Template Switching Oligo                         | iC-iG-iCACACTCTTCCCTACACGACGrGrGrG                                                                           | Eurogentec                  | HPLC                               | iC denotes a iso-dC; iG denotes a iso-dG; rG denotes a riboguanine                                                                                                                                                                                      |
| SCRB-TSO-LNA     | SCRB-seq Template Switching Oligo with Locked Nucleic Acid | iC-iG-iCACACTCTTCCCTACACGACGrGrG+G                                                                           | Eurogentec                  | HPLC                               | iC denotes a iso-dC; iG denotes a iso-dG; rG denotes a riboguanine; +G denotes a locked nucleic acid guanine                                                                                                                                            |
| SCRB-SMART-PCR   | SCRB-seq SMART PCR Primer                                  | /5Biosg/ACACTCTTCCCTACACGACGC                                                                                | Integrated DNA Technologies | HPLC                               | /5Biosg/ denotes a 5' biotin                                                                                                                                                                                                                            |
| SMART-P5         | SCRB-seq N5 primer                                         | AATGATACGGCGACCACCGAGATCTACACTCTTCCCTACACGACGC<br>TCTCCG*A*T*C*T*                                            | Integrated DNA Technologies | HPLC                               | * denotes a phosphorothioate bond                                                                                                                                                                                                                       |
| SCRB-CR1         | SCRB-seq Custom Read 1 Primer                              | TCTTCCCTACACGACGCTCTCCGATCT                                                                                  | Integrated DNA Technologies | HPLC                               |                                                                                                                                                                                                                                                         |
